# Supplementary material for: Pre-pregnancy parental BMI and offspring blood pressure in infancy
Source: PubMed Central journal article supplement — Eur J Prev Cardiol. 2019 Jun 25;26(15):1581–90. doi: 10.1177/2047487319858157 (PMC6753651; doi:10.1177/2047487319858157), 2019-06-25
Supplement: Supplemental_Material.pdf [file Supplemental_Material.pdf]

## Appendix

**Table 1.** Baseline characteristics of BRAVO participants and participants who were loss to follow up/ no data was available.

|                                              | Loss to follow-up or<br>no data available<br>(413) | Participants<br>(587) | <b>P-value</b> |
|----------------------------------------------|----------------------------------------------------|-----------------------|----------------|
| Status trial (intervention)                  | 42.6                                               | 50.9                  | 0.002          |
| <b>Maternal characteristics</b>              |                                                    |                       |                |
| Mean (sd) BMI (kg/m <sup>2</sup> )           | 23 (5)                                             | 22 (4)                | 0.24           |
| Mean (sd) pre-pregnancy weight (kg)          | 55 (12)                                            | 54 (11)               | 0.28           |
| Mean (sd) height (cm)                        | 156 (5)                                            | 156 (6)               | 0.87           |
| Education (%)                                |                                                    |                       | 0.87           |
| <i>Uneducated, Elementary/ Junior School</i> | 28.6                                               | 26.8                  |                |
| <i>Senior high school</i>                    | 64.9                                               | 66.0                  |                |
| <i>University</i>                            | 6.5                                                | 7.2                   |                |
| Occupational Status (employed) (%)           | 27.8                                               | 25.1                  | 0.44           |
| Type of job (white collar) (%)               | 67.7                                               | 58.9                  | 0.28           |
| Family income (per month) (%)                |                                                    |                       | <0.001         |
| <i>≤ IDR 750,000</i>                         | 16.3                                               | 13.5                  |                |
| <i>IDR 750,000 - ≤ IDR 3,000,000</i>         | 69.8                                               | 56.2                  |                |
| <i>IDR 3,000,000 - &gt; IDR 9,000,000</i>    | 13.9                                               | 30.3                  |                |
| Median (IQR) parity (n)                      | 2 (2)                                              | 2 (2)                 | 0.18           |

**Paternal characteristics**

|                                              |         |         |      |
|----------------------------------------------|---------|---------|------|
| Mean (sd) BMI (kg/m <sup>2</sup> )           | 23 (4)  | 23 (4)  | 0.69 |
| Mean (sd) weight (kg)                        | 65 (12) | 64 (11) | 0.32 |
| Mean (sd) height (cm)                        | 168 (8) | 167 (6) | 0.24 |
| Education (%)                                |         |         | 0.24 |
| <i>Uneducated, Elementary/ Junior School</i> | 13.3    | 22.0    |      |
| <i>Senior high school</i>                    | 75.2    | 67.6    |      |
| <i>University – undergraduate</i>            | 11.5    | 10.3    |      |
| Occupational Status (employed) (%)           | 96.2    | 96.9    | 0.76 |
| Type of job (white collar) (%)               | 36.6    | 27.4    | 0.07 |
| Smoking (yes) (%)                            | 69.0    | 66.6    | 0.73 |

---

## Appendix

**Table 2.** Associations between maternal pBMI and offspring' mean BP over the first year of life.

|                                           | Maternal pBMI (kg/m <sup>2</sup> )                        |                    |
|-------------------------------------------|-----------------------------------------------------------|--------------------|
|                                           | Linear regression coefficients (95% confidence intervals) |                    |
|                                           | SBP (mmHg)                                                | DBP (mmHg)         |
| <b>Model 1*</b>                           | 0.24 (0.05; 0.44)                                         | 0.13 (0.01; 0.25)  |
| <b>Model 2<math>\bar{\tau}</math></b>     | 0.24 (0.04; 0.43)                                         | 0.13 (0.004; 0.25) |
| <b>Model 3<math>\ddagger</math></b>       | 0.23 (0.03; 0.43)                                         | 0.13 (0.002; 0.25) |
| <b>Model 4<math>\rlap{/}\delta</math></b> | 0.28 (0.07; 0.50)                                         | 0.14 (0.01; 0.27)  |

\* Crude model including additionally mother's age at giving birth and second hand prenatal smoke exposure.

$\bar{\tau}$  Model 1 and maternal education.

$\ddagger$  Model 1: selection of all offspring; offspring of women who had any gestational disease ((pre-) eclampsia, gestational hypertension, gestational diabetes) were excluded (n=20).

$\rlap{/}\delta$  Crude model including additionally mother's age at giving birth: selection of all offspring; offspring of women who smoked during pregnancy were excluded (n=9).
